1 **FGF2 promotes the expansion of parietal mesothelial progenitor pools and inhibits BMP4-**  
2 **mediated smooth muscle cell differentiation**

3

4 **Youngmin Hwang<sup>1</sup>, Yuko Shimamura<sup>1</sup>, Junichi Tanaka<sup>1</sup>, Akihiro Miura<sup>1</sup>, Anri Sawada<sup>1</sup>,**  
5 **Hemanta Sarmah<sup>1</sup>, Dai Shimizu<sup>1</sup>, Yuri Kondo<sup>1</sup>, Zurab Ninish<sup>1</sup>, Kazuhiko Yamada<sup>2</sup>,**  
6 **Munemasa Mori<sup>1</sup>†**

7

8 <sup>1</sup>*Columbia Center for Human Development (CCHD), Columbia University Irvine Medical*  
9 *Center, New York, USA.*

10

11 <sup>2</sup>*Department of Surgery, Johns Hopkins University, Baltimore, MD, USA*

12

13

14 **Summary**

15 Mesothelial cells, in the outermost layer of internal organs, are essential for both organ  
16 development and homeostasis. Although the parietal mesothelial cell is the primary origin of  
17 mesothelioma that may hijack developmental signaling, the signaling pathways that  
18 orchestrate developing parietal mesothelial progenitor cell (MPC) behaviors, such as MPC pool  
19 expansion, maturation, and differentiation, are poorly understood. To address it, we established  
20 a robust protocol for culturing WT1<sup>+</sup> MPCs isolated from developing pig and mouse parietal  
21 thorax. Quantitative qPCR and immunostaining analyses revealed that BMP4 facilitated MPC  
22 differentiation into smooth muscle cells (SMCs). In contrast, FGF2 significantly promoted  
23 MPC progenitor pool expansion but blocked the SMC differentiation. BMP4 and FGF2  
24 counterbalanced these effects, but FGF2 had the dominant impact in the long-term culture. A  
25 Wnt activator, CHIR99021, was pivotal in MPC maturation to CALB2<sup>+</sup> mesothelial cells,  
26 while BMP4 or FGF2 was limited. Our results demonstrated central pathways critical for  
27 mesothelial cell behaviors.

28

29 † **To whom correspondence should be addressed:**

30

31 **Munemasa Mori, MD, Ph.D.**

32 Assistant Professor of Medicine,

33 Columbia Center for Human Development (CCHD),

34 Pulmonary Allergy & Critical Care Medicine, Department of Medicine,

35 Columbia University Irving Medical Center

36 Email: [mm4452@cumc.columbia.edu](mailto:mm4452@cumc.columbia.edu)

37 Tel: 212-305-1731

38

39 **Key words**

40 Parietal mesothelial cell self-renewal, differentiation, maturation, FGF2, BMP4, PDGF-BB,

41 Wnt

## 42 Introduction

43 The mesothelium, a distinctive cell type forming the pleural monolayer, envelopes  
44 the outermost layers of the viscera and facilitates the growth of developing organs. Despite  
45 the known fact that aberrant proliferation of adult mesothelial cells, often aggravated by  
46 asbestos exposure, can lead to mesothelioma through the manipulation of developmental  
47 pathways, the specific signaling processes that dictate progenitor pool expansion, embryonic  
48 mesothelial progenitor cell (MPC) maturation, and their differentiation into smooth muscle  
49 cells (SMC) remain poorly understood.

50 Anatomically, adult mature mesothelial cells of the parietal and visceral pleura  
51 encase the inner layer of the thorax and the outer layer of the lungs, respectively. Mouse  
52 lineage-tracing analyses showed that visceral mesothelial cells in developing lung pleura  
53 migrate inward and differentiate into vascular smooth muscle cells<sup>1</sup>, parabronchial smooth  
54 muscle cells<sup>2</sup>, and myofibroblast<sup>3</sup>, highlighting the multipotency of developmental MPCs.  
55 During development, the MPC arises from the exact origin, lateral plate mesoderm<sup>4</sup>, while  
56 mesothelioma tends to originate from parietal mesothelial cells<sup>5</sup>. Since carcinogenesis often  
57 hijacks developmental programs<sup>6</sup>, studying parietal mesothelial development could  
58 significantly advance mesothelioma diagnosis and treatment.

59 Mesothelioma, a rare and aggressive cancer often caused by carcinogens like  
60 asbestos or tar, has a notably high mortality rate<sup>7</sup>. The prevalence is high in the countries such  
61 as the United Kingdom, Australia, and New Zealand<sup>8</sup>. Various tumor markers were  
62 identified, including Calretinin (CALB2), mesothelin (MSLN), type III collagen (COL3A1),  
63 and secretory leukocyte peptidase inhibitor (SLP1)<sup>9</sup>. Despite the availability of treatments  
64 such as surgical decertification and chemotherapy, most cases are diagnosed at advanced  
65 stages, limiting effective intervention options<sup>10</sup>. A better understanding of the behavior of  
66 MPCs in the parietal pleura during development could develop the prognostic markers of  
67 mesothelioma.

68 In mouse embryos, Wilms Tumor Protein 1 (WT1), a representative mesothelial cell  
69 marker, is expressed on visceral and parietal mesothelial cells from the lung and the thoracic  
70 cavity<sup>1,11</sup>. *WT1* knockout mice showed hypoplastic lung phenotype<sup>11,12</sup> and the defects of  
71 human mesothelial cells by Congenital Diaphragmatic Hernia (CDH), also known to develop  
72 lung hypoplasia<sup>13</sup>.

73 Previous in vitro studies have shown that Fibroblast growth factor 2 (FGF2) and  
74 platelet-derived growth factor (PDGF) are required for the proliferation of adult mesothelial  
75 cells<sup>14</sup>. Notably, high expression of FGF2 in mesothelioma correlated with poor prognosis<sup>15</sup>.

76 Bone morphogenic protein 4 (BMP4) is expressed in the human adult peritoneal  
77 mesothelium and plays a pivotal role in mesothelial-to-mesenchyme transition (MMT),  
78 attenuating the TGF-beta-mediated MMT phenotype<sup>16</sup>. BMP4 is expressed ventral to the

79 distal lung bud mesenchyme and at the distal lung bud tips of the endoderm<sup>17,18</sup>, but the  
80 association with the behavior of WT1<sup>+</sup> MPC is unknown.

81 Additionally, Sonic hedgehog (SHH) and Retinoic acid (RA) are implicated in MPC  
82 migration and epithelial morphology transformation, respectively<sup>19</sup>.

83 However, how these signaling pathways intertwine and distinctively regulate MPC  
84 pool expansion, differentiation, and maturation during development has yet to be determined,  
85 necessitating robust culture methods for detailed study.

86 This study successfully allowed us to establish the method to isolate and culture  
87 embryonic parietal MPC from developing pig and mouse thorax. By culturing these cells with  
88 a range of small molecules and growth factors, we aimed to elucidate the signaling pathways  
89 crucial for mesothelial cell development.

90

## 91 **Results**

92

### 93 ***Establishment of Cell Culture Protocol for the Expansion of Developing Pig Mesothelial*** 94 ***Cells***

95 The development of pig lungs undergoes embryonic, pseudo glandular, canalicular,  
96 and alveolar stages around embryonic day 19 (E19), E25, 60, and E90, respectively<sup>20,21</sup>. The  
97 developmental stage at which pig parietal mesothelial progenitor cells (MPCs) could be  
98 efficiently harvested was unknown. We harvested the parietal MPCs from the E80 canalicular  
99 stage thorax to have enough cell numbers.

100 To harvest a WT1<sup>+</sup> developing MPC efficiently, we compared several methods  
101 previously reported<sup>22-25</sup>, including collecting pleural fluid, pinching porcine thoracic walls  
102 with tweezers, scaring it with scrapers, or trypsinizing the porcine thoracic wall. Among  
103 those methods, trypsinization with a 0.05% trypsin inside the E80 thoracic walls showed the  
104 highest yield of MPC collection (**Figure 1A**). Interestingly, 0.25% trypsin treatment to the  
105 thorax did not expand the MPC (**Figure S1A, B**). Previous papers showed the requirement of  
106 EGF for culturing EGF<sup>23,25</sup>. Contrary to expectations, MPC culture with EGF didn't offer an  
107 apparent effect on MPC colony expansion (**Figure S1C**). To expand MPC efficiently, we  
108 coated the cell culture dish with extracellular matrix (ECM) molecules (type I collagen (Col  
109 I) and hyaluronic acid (HA)), given their expression in adult mature mesothelial cells<sup>26,27</sup>. We  
110 found that the isolated MPC showed the sustained expression of *Col I* expression and its  
111 receptor, *integrin beta 1 (ITGB1)*, but a relatively low expression of HA receptor (*CD44*)  
112 (**Figure 1B**). Indeed, Col I coating significantly enhanced MPC expansion compared to HA  
113 coating (HA) and an uncoated control (**Figure 1C, D**). Since the gelatin and Col1 share the  
114 integrin-binding motif, RGD sequence<sup>28</sup>, we cultured the MPC on the gelatin-coated dish and  
115 confirmed its efficacy in expanding MPCs<sup>27</sup> (**Figure 1E**). Based on this, we performed all

116 downstream analyses on the gelatin-coated dish. Additionally, we confirmed that mouse  
117 MPC can be collected and expanded well after the trypsinization directly on the E17.5 mouse  
118 canalicular ~ sacculation stage thorax, noting that 0.25% trypsin was more effective for  
119 mouse MPCs than 0.05% (**Figure S1D-F**). These results underscore the robustness and  
120 effectiveness of our trypsinization-based protocol for isolating parietal MPCs in  
121 development.

122

### 123 ***FGF2 Promotes Expansion of Pig Mesothelial Progenitor Cells (MPCs)***

124 While the role of FGF2 and PDGF in adult mesothelial cell proliferation is known,  
125 their impact during development is little known<sup>14</sup>. To confirm each molecule's effect on  
126 developing MPCs, we cultured MPC with FGF2 and PDGF-BB for 3 days (**Figure 2**).  
127 PDGF-BB was chosen as the signaling molecule for the PDGF signaling pathway due to its  
128 binding potential to all PDGF receptors<sup>29</sup>. We found that FGF2 and PDGF-BB treatment  
129 increased total cell number as well as the WT1<sup>+</sup> cell numbers compared to the basal condition  
130 control (**Figure 2A-D**). Ki67 immunostaining confirmed that FGF2 and PDGF-BB  
131 significantly increased proliferating cell numbers (**Figure 2A, B, E**). Notably, FGF2 and  
132 PDGF-BB induced a more than four times increase in proliferating Ki67<sup>+</sup> WT1<sup>+</sup> MPC  
133 proportion compared with the control in the short-term culture (**Figure 2F**). In contrast, the  
134 treatment with SU5402, a FGFR inhibitor, and CP 673451, a PDGFR inhibitor, significantly  
135 decreased both total and WT1 cell numbers (**Figure 2C, D**) by inducing 30~40% of cell  
136 death, labeled by Cleaved Caspase3 (CASP3) 1-day post-treatment (**Figure S2**). These  
137 results suggested that the effect of endogenous FGF2 and PDGF activation cultured in the  
138 basal medium impacts ~40% of MPC survival and that FGF2 and PDGF signaling may be  
139 essential for WT1<sup>+</sup> MPC maintenance. To investigate the effect of FGF2 and PDGF on MPC  
140 pool expansion in the long term, we cultured the MPCs with FGF2 or PDGF-BB for 14 days  
141 and analyzed *WT1* mRNA expression by qPCR (**Figure 2G-I**). We found that FGF2  
142 maintained *WT1* mRNA expression more than 5 times fold change compared to the control  
143 during long-term culture (**Figure 2H**), while the effect of PDGF-BB pool expansion did not  
144 significantly influence the *WT1* expression compared to the control over time (**Figure 2I**).  
145 These results suggest that FGF2 efficiently expands the MPC pools, but the PDGF-BB effect  
146 on the expansion is temporally and limited.

147

### 148 ***BMP4 Drives Differentiation of MPCs into SMC***

149 During the MPC control culture condition, WT1<sup>-</sup>α-SMA<sup>+</sup> cells were observed (5.8  
150 ± 3.3 %) (**Figure 2B**). We speculated that WT1<sup>+</sup> MPCs could spontaneously differentiate  
151 into smooth muscle cells (SMCs), given that mouse visceral lung mesothelial cells  
152 differentiate into smooth muscle cells during mouse lung development<sup>1,2</sup>. To find which  
153 signaling molecules induce MPC differentiation into SMC, we cultured MPC with various

154 small molecules and inhibitors with different concentrations and screened  $\alpha$ -SMA mRNA  
155 expression by qPCR analysis (**Figure S3A**). We discovered that the BMP4 and ascorbic acid  
156 (AA) condition enhanced  $\alpha$ -SMA mRNA expression compared to control among the tested  
157 conditions. Since BMP4 more dramatically induced SMC differentiation than AA, we  
158 focused on further analyses of BMP signaling. qPCR analyses found that BMP4 treatment  
159 showed significantly higher  $\alpha$ -SMA mRNA induction both in short-term and long-term  
160 cultures, while BMP4 treatment had a transient effect on *WT1* mRNA increase only in the  
161 short term but did not sustain its impact in the long term (**Figure 3B, C**). In contrast,  
162 Dorsomorphin, a BMP4 inhibitor, significantly reduced  $\alpha$ -SMA mRNA expression with no  
163 significant change in *WT1* mRNA expression (**Figure 3B**). Since the kinetics of *WT1* and  $\alpha$ -  
164 *SMA* mRNA by BMP4 treatment indicated the MPC differentiation into SMC, we  
165 investigated the detailed cell fate change from MPC to SMC by immunostainings in short-  
166 term culture (**Figure 3A**). Consistent with the qPCR observations, immunostaining analysis  
167 showed a significantly increased  $\alpha$ -SMA<sup>+</sup> cell proportion (Control:  $7.8 \pm 1.7$  % vs. BMP4:  
168  $31.4 \pm 1.4$  %) and the number by BMP4 treatment (**Figure 3A, D-F**), while dorsomorphin  
169 significantly reduced the  $\alpha$ -SMA<sup>+</sup> SMC proportion ( $6.7 \pm 3.0$  %). Unlike FGF2 and PDGF-  
170 BB (**Figure 2**), BMP4 treatment did not alter the total cell number, WT1<sup>+</sup> MCP numbers, or  
171 WT1<sup>+</sup> proportion but significantly increased Ki67<sup>+</sup> cells (**Figure 3F-H**) while inducing about  
172 20% of CASP3<sup>+</sup> cell death, which might be the cell selection step (**Figure S2**). Indeed, BMP4  
173 selectively eliminates the WT1<sup>-</sup> Ki67<sup>-</sup>  $\alpha$ -SMA<sup>-</sup> unknown cell type while dorsomorphin  
174 significantly increased it (**Figure 3D**). Intriguingly, we observed a significantly increased  
175 proportion of WT1<sup>+</sup>  $\alpha$ -SMA<sup>+</sup> cells in WT1<sup>+</sup> MPC (control:  $9.9 \pm 1.9$  % vs. BMP4 group:  $46.4$   
176  $\pm 6.4$  %) by BMP4 treatment (**Figure 3I**), but proportion of WT1<sup>-</sup>  $\alpha$ -SMA<sup>+</sup> in SMC (control:  
177  $30.7 \pm 15.4$  % vs. BMP4 group:  $43.7 \pm 8.6$  %) (**Figure 3J**) was not significantly changed.  
178 On the other hand, we did not observe any change in the proportion of WT1<sup>+</sup>  $\alpha$ -SMA<sup>+</sup> in  $\alpha$ -  
179 SMA<sup>+</sup> cells (**Figure 3K**). These results indicate that BMP4 treatment primes the mesothelial  
180 progenitor pools to co-express WT1 and  $\alpha$ -SMA, facilitating MPC differentiation into SMCs.  
181 Based on these results, including long-term culture, we concluded that the pivotal role of  
182 BMP4 is to induce parietal MPC differentiation into  $\alpha$ -SMA<sup>+</sup> SMC with losing WT1  
183 expression.

184

### 185 *FGF2 and PDGF-BB Suppressed MPC Differentiation into SMCs*

186 We observed MPC progenitor pool regulation by FGF2 and PDGF-BB (**Figure 2**)  
187 and differentiation into  $\alpha$ -SMA<sup>+</sup> SMC by BMP4 (**Figure 3**), but it was unclear whether FGF2  
188 and PDGF-BB influence the SMC pools. To address this, we performed qPCR analyses. We  
189 found that the decreased  $\alpha$ -SMA mRNA expression by the FGF2 or PDGF-BB over time  
190 (**Figure 4A, B, S3**), and the further analysis of IF data showed that the proportion of  $\alpha$ -SMA<sup>+</sup>  
191 cells was significantly reduced by the FGF2 or PDGF-BB treatment (Control vs. FGF2 vs.

192 PDGF-BB groups:  $7.8 \pm 1.7$  % vs.  $2.5 \pm 0.5$  % vs.  $3.2 \pm 0.4$  %), while BMP4 significantly  
193 induced  $\alpha$ -SMA<sup>+</sup> cells ( $31.4 \pm 1.4$  %) (**Figure 4C**). In particular, PDGF-BB showed a  
194 dramatic decrease of  $\alpha$ -SMA mRNA than FGF2 (**Figure 4B**). While there were no significant  
195 changes in the proportion of proliferating  $\alpha$ -SMA<sup>+</sup> cells, the proportion of WT1<sup>+</sup> $\alpha$ -SMA<sup>+</sup>  
196 cells was significantly decreased by the FGF2 or PDGF treatment (Control vs. FGF2 vs.  
197 PDGF-BB groups:  $9.9 \pm 1.9$  % vs.  $3.8 \pm 0.9$  % vs.  $3.4 \pm 1.3$  %) (**Figure 4D, E**). These  
198 results indicate that FGF2 and PDGF play a central role in MPC progenitor pool expansion  
199 by inhibiting the induction of WT1<sup>+</sup> $\alpha$ -SMA<sup>+</sup> primed cells, leading to  $\alpha$ -SMA<sup>+</sup> smooth muscle  
200 cells (**Figure 4F**).

201

### 202 ***Dominance of FGF2 Effect Over BMP Signaling in MPC Pool Regulation***

203 Since we found FGF2 and PDGF suppressed BMP4-mediated MPC differentiation  
204 into SMC (**Figure 2-4**), we cultured MPC with the combination of FGF2 and BMP4 (FGF2 +  
205 BMP4) or PDGF-BB and BMP4 (PDGF-BB + BMP4) to investigate the potential counter  
206 effect. We found that MPC culture with FGF2 + BMP4 and PDGF-BB + BMP4 significantly  
207 suppressed the BMP4-mediated MPC differentiation into SMC with lower  $\alpha$ -SMA mRNA  
208 expression than the BMP4 group (**Figure 5A**). This mRNA expression trend was the same in  
209 the long-term culture (**Figure 5B**). Although the short-term treatment with FGF2 + BMP4  
210 and PDGF-BB + BMP4 showed a decrease in *WT1* mRNA expression (**Figure 5A**), the long-  
211 term effect with FGF2 + BMP4 exhibited an increase in the *WT1* mRNA expression  
212 compared to controls (**Figure 5B**), consistent with the FGF2 effect (**Figure 2**). The long-term  
213 effect of PDGF-BB + BMP4 did not impact the *WT1* mRNA expression. Interestingly, the  
214 FGF2+BMP4 or PDGF-BB+BMP4 condition induced more cell proliferation with a higher  
215 total cell number than the BMP4 group in the short term (**Figure 5C-G**). In contrast, FGF2 +  
216 PDGF-BB and PDGF-BB + BMP4 conditions significantly increased WT1<sup>+</sup> MPCs and  
217 proliferating cell numbers than the control condition in the short-term but could not sustain  
218 *WT1* mRNA expression in the long-term (**Figure 5A, E, F**). FGF2 + PDGF-BB and PDGF-  
219 BB + BMP4 conditions treatment significantly decreased  $\alpha$ -SMA<sup>+</sup> cells and showed no  
220 increase of primed WT1<sup>+</sup> $\alpha$ -SMA<sup>+</sup> cells in WT1<sup>+</sup> cells (**Figure 5G, H**). As we expected, there  
221 was no significant change in WT1<sup>+</sup> $\alpha$ -SMA<sup>+</sup> cells in  $\alpha$ -SMA<sup>+</sup> cells (**Figure 5I**). These results  
222 suggest the critical role of FGF2 in maintaining the MPC pool and its self-renewal that  
223 counteracts the BMP signaling effects on MPC differentiation into SMC.

224

### 225 ***Wnt Signaling Facilitates MPC Maturation***

226 During development, mesenchymal  $\beta$ -catenin signaling controls parabronchial  
227 smooth muscle cell (PSMC) progenitors in the sub-mesothelial mesenchyme<sup>2</sup>. Wnt signaling  
228 is involved in the outer mesothelial pool size of the zebrafish swimbladder during  
229 development<sup>28</sup>. However, the molecular characterization of MPCs and their maturation

230 during pig lung development have been little studied. To address this issue, we performed  
231 immunostaining of WT1 and CALB2 in pig and mouse lung development (**Figure S4**).  
232 Developing porcine pleural mesothelial cells expressed high levels of WT1 in the E26 early  
233 pseudoglandular stage of porcine lungs, but the relative expression level in the peripheral  
234 layer of the lungs was decreased in the later stage (**Figure S4A, B**). In contrast, CALB2  
235 expression was not detected in the peripheral layer of the lungs in the E26 and E40 early  
236 pseudoglandular stage but appeared in the canalicular stage and afterward (**Figure S4D, E**).  
237 These results indicate that CALB2 is the marker for mesothelial cell maturation during  
238 porcine lung development. We also confirmed that the WT1 expression pattern was also  
239 similar during mouse lung development, supported by previous studies<sup>1,19</sup> (**Figure S4C**),  
240 while CALB2 started to be expressed in the sub-peripheral layer from the E14.5  
241 pseudoglandular stage in mouse lung development (**Figure S4F**).

242 To investigate the common MPC maturation markers across the species, we revisited  
243 the deposit single-cell RNA-seq (scRNA-seq) database of developing human<sup>30</sup> and mouse<sup>31</sup>  
244 lung mesenchyme (**Figure S5**). We found that *WT1* was highly expressed in the early  
245 pseudoglandular stage but decreased its expression in the late pseudoglandular and  
246 canalicular stages of human and mouse-developing lungs. *CALB2*, a mature mesothelial cell  
247 marker, was slightly observed but not abundant in human lung development. During mouse  
248 lung development, *CALB2* was observed in non-mesothelial cells. In contrast, mesothelin  
249 (*MSLN*) expression was observed in the late pseudoglandular stage of developing human  
250 lungs to the canalicular stage while around the E18 sacculation stage and afterward in the  
251 mouse lungs. These results suggest that decreased expression of *WT1* and increased *MSLN*  
252 are the evolutionarily conserved markers for MPC maturation, but *CALB2* is a pig-specific  
253 unique marker for MPC maturation. Based on these results, we examined pig MPC  
254 maturation in an in vitro study using *WT1*, *CALB2*, and *MSLN*.

255 We performed qPCR to screen the most potent signaling molecules regulating pig  
256 MPC maturation to *CALB2*<sup>+</sup> and *MSLN*<sup>+</sup> mature mesothelial cells (**Figure S3B, C**). Among  
257 them, we found that most signaling molecules induced the upregulation of *CALB2* and *MSLN*  
258 mRNA. In particular, the GSK3 $\beta$  inhibitor that acts as a Wnt activator (CHIR) showed the  
259 most dramatic increase in *CALB2* mRNA expression. Thus, we focused on analyzing Wnt  
260 signaling using CHIR in the MPC maturation. Three days of short-term CHIR treatment  
261 increased *WT1*, *CALB2*, and *MSLN* mRNA expressions, while the long-term CHIR treatment  
262 lost *WT1*<sup>+</sup> MPC pools but relatively sustained *CALB2* expression (**Figure 6A**). Since high  
263 *WT1* mRNA expression is the landmark for immature MPC pool expansion, these results  
264 indicate that the MPC maturation by CHIR occurred as a long-term effect (**Figure 6A**).  
265 Interestingly, we also found that long-term treatment with FGF2 or BMP4 significantly  
266 increased *MSLN* mRNA expression compared to the control (**Figure 6B**). However, FGF2  
267 did not increase the mRNA expression of *MSLN* and *CALB2* in a dose-dependent manner in



268 short-term culture, while BMP4 induced *CALB2* mRNA expression in a dose-dependent  
269 manner (**Figure S3C**). Furthermore, the *CALB2* mRNA upregulation by FGF2 or BMP4 was  
270 transient and relatively limited in the long-term treatment compared to the CHIR treatment  
271 (**Figure 6B**). Consistent with the qPCR results, the *CALB2* immunostaining exhibited a  
272 consistent trend with qPCR results, indicating the increased *CALB2*<sup>+</sup> cells by CHIR  
273 treatment (**Figure 6C, D**). As shown in the PDGF-BB effect, CHIR induced *Ki67*<sup>+</sup>  
274 proliferative *WT1*<sup>+</sup> cells and significantly increased total cell numbers compared to control  
275 (**Figure S6A-C**), while no *WT1*<sup>+</sup> cell number or proportional change and reduced  $\alpha$ -SMA<sup>+</sup>  
276 cell number (**Figure S6D, E**). These results indicate that Wnt signaling activation induces  
277 MPC maturation into *MSLN*<sup>+</sup> *CALB2*<sup>+</sup> cells, corresponding to the expression pattern of  
278 *CALB2* in porcine lung development.

279

## 280 Discussion

281 Previous studies showed the markers of adult mesothelial cells or in mesothelioma,  
282 but it has been unclear how developing mesothelial progenitors shift the marker expressions  
283 and their association with cellular behaviors. We established an MPC expansion protocol that  
284 allows us to find the foundation of signaling pathways involved in MPC pool expansion,  
285 differentiation, and maturation. Technically, we could not expand the cells from the E40 or  
286 earlier time point's thoracic wall in either method due to the low effectiveness of isolating  
287 MPCs even using swine specimens larger than mice (data not shown). Harvesting MPC  
288 exclusively from the lungs was also challenging because it contained various other cell types  
289 after the culture (data not shown). Based on these technical limitations, we focused on the  
290 MPC cellular analysis derived from the E80 thoracic walls. Of note, we also expand mouse  
291 MPC, in this culture condition, from the thorax at E17.0 ~ E17.5 canalicular ~ sacculation  
292 stage, corresponding to E80 pig developmental time points, indicating the robustness of our  
293 culture protocol to harvest and expand MPC (**Figure S1**).

294 FGF signaling pathways have been classically known as critical mitogens for both  
295 epithelium and mesenchyme<sup>32-34</sup>. Interestingly, mesothelial cells and mesothelioma have  
296 been characterized as epithelial-like and mesenchymal-like features<sup>35,36</sup>. We found that FGF2  
297 has the most potent effect on MPC self-renewal in the long-term culture among tested  
298 conditions and inhibits BMP4-mediated SMC differentiation. Given that FGF2 high  
299 expression in mesothelioma is one of the critical prognosis factors and carcinogenesis often  
300 renders developmental program<sup>37-39</sup>, we speculate that targeting therapy for the FGF2 and its  
301 downstream, such as *Spry2*<sup>40</sup>, *Ras*<sup>41</sup>, or *Sos*<sup>42</sup>, may be critical for controlling FGF2<sup>high+</sup>  
302 mesothelioma expansion and metastasis.

303 We found BMP4 signaling was critical for inducing MPC differentiation into SMC  
304 with an increase of  $\alpha$ -SMA<sup>+</sup> cells, including primed, transitioning *WT1*<sup>+</sup> $\alpha$ -SMA<sup>+</sup> cells and

305 differentiated  $WT1^- \alpha\text{-SMA}^+$  cells (**Figure 4**). The molecular mechanism of how BMP4  
306 converts MPC to SMC needs to be determined in the future. Interestingly, our  
307 immunostaining analyses revealed that proliferating  $Ki67^+ \alpha\text{-SMA}^+$  cells were never observed  
308 without tuning on  $WT1$  (**Figure 4**). BMP4 initially induced  $WT1^+ Ki67^+ \alpha\text{-SMA}^+$  transitioning  
309 cells but later lost the  $WT1$  mRNA expression (**Figure 3B**), suggesting that the critical role of  
310 BMP4 in MPC cell fate change to post-mitotic terminally differentiated SMC. Since retinoic  
311 acid treatment for acute leukemia patients induces terminally differentiated cells and is an  
312 effective therapy for those patients<sup>43</sup>, how BMP4 signaling activation would influence  
313 mesothelioma would be an attractive question.

314 Parietal MPC and lung peripheral MPC showed distinct morphology and function<sup>44</sup>.  
315 Our study showed that potential CALB2 descendants of MPC appeared around the  
316 neighboring  $WT1^+$  mesothelium (**Figure S4D, E**), supported by previous studies of mouse  
317 lung development<sup>45</sup>. There are remaining exciting questions regarding MPC maturation:  
318 about the role of CALB2 in porcine parietal MPC, its developmental distributions, how the  
319 parietal and lung-peripheral MPC distinctively mature, and how these MPC pools  
320 communicate during development. Interestingly, we did not observe  $CALB2^+$  cells on the  
321 parietal mesothelium during mouse development (**Figure S4F**). We examined three different  
322 antibodies against MSLN to investigate the maturation of MPC during development.  
323 However, MSLN expression was not detected in developing lungs and thorax, as in the  
324 previous study<sup>19</sup>, which is inconsistent with the scRNA-seq result (**Figure S5B**). This  
325 indicates that protein expression may be regulated at post-translational levels or require  
326 further technical advancements.

327 Interestingly, the  $WT1^+$  MPC showed  $\alpha\text{-SMA}$  expression, reminiscent of porcine  
328 parietal mesothelial cells in the E26 early pseudoglandular stage (**Figure 1E, Figure S4A**),  
329 while it is uncommon in peripheral lung MPC. In our culture model, we used MPC at the  
330 canalicular ~ sacculation stage. Our results indicate that porcine parietal MPCs may be a  
331 source of SMCs around the developing ribs.

332 We summarized MPC fate change by signaling molecules (**Figure 7**). Interestingly,  
333 FGF2 promoted the expansion of both  $WT1^+$  MPC and  $WT1^- \alpha\text{-SMA}^-$  pool compared to the  
334 control (**Figure 2B**). The  $WT1^- \alpha\text{-SMA}^-$  pool would involve  $CALB2^+$  mature mesothelial  
335 cells. However, BMP4 suppressed the  $WT1^- \alpha\text{-SMA}^-$  pool expansion (**Figure 3D**), while  
336 BMP4 also increased CALB2 expression in short-term culture (**Figure 6B, D**). This  
337 discrepancy suggests the existence of  $WT1^- \alpha\text{-SMA}^- CALB2^-$  unknown pool, which may have  
338 a role in the MPC regulation (**Figure 7**). Further analysis using genetic lineage tracing or  
339 single cell level bioinformatics analysis may reveal the lineage hierarchy, parietal MPC vs.  
340 peripheral lung MPC vs.  $WT1^- \alpha\text{-SMA}^-$  niche interactions, and association with  
341 mesothelioma, which will lead to further understanding of mesothelial development and  
342 pathogenesis.

343

344 **Acknowledgments**

345           We thank Zurab Ninish for his technical assistance. We sincerely appreciate scientific  
346 input from Dr. Jianwen Que and Dr. Wellington Cardoso at the Columbia Center for Human  
347 Development (CCHD) and the members of Cardoso's lab and CCHD. We acknowledge the  
348 support from the CCHD Medicine Microscopy Core (MMC) (NIH S10 OD032447-01). This  
349 work was funded by NIH-NHLBI 1R01 HL148223-01, DoD PR190557, PR191133 to M. M.  
350

351 **Author contributions**

352 Youngmin Hwang, Validation, Investigation, Visualization, Methodology, Writing – original  
353 draft; Yuko Shimamura, Junichi Tanaka, Akihiro Miura, Anri Sawada, Hemanta Sarmah, Dai  
354 Shimizu, Yuri Kondo, Investigation, Validation; Zurab Ninish, Kazuhiko Yamada,  
355 Methodology; Munemasa Mori, Conceptualization, Data curation, Supervision, Funding  
356 acquisition, Validation, Investigation, Methodology, Project administration, Writing – review  
357 and editing.

358

359 **Declaration of interests**

360 The authors declare no competing interests.

361

362

## 363 **References**

- 364 1. Que, J., Wilm, B., Hasegawa, H., Wang, F., Bader, D., and Hogan, B.L.M. (2008).  
365 Mesothelium contributes to vascular smooth muscle and mesenchyme during lung  
366 development. *Proc Natl Acad Sci U S A* *105*. 10.1073/pnas.0808649105.
- 367 2. De Langhe, S.P., Carraro, G., Tefft, D., Li, C., Xu, X., Chai, Y., Minoo, P.,  
368 Hajihosseini, M.K., Drouin, J., Kaartinen, V., et al. (2008). Formation and  
369 differentiation of multiple mesenchymal lineages during lung development is regulated  
370 by  $\beta$ -catenin signaling. *PLoS One* *3*. 10.1371/journal.pone.0001516.
- 371 3. Choo, Y.Y., Sakai, T., Komatsu, S., Ikebe, R., Jeffers, A., Singh, K.P., Idell, S.,  
372 Tucker, T.A., and Ikebe, M. (2022). Calponin 1 contributes to myofibroblast  
373 differentiation of human pleural mesothelial cells. *Am J Physiol Lung Cell Mol*  
374 *Physiol* *322*. 10.1152/AJPLUNG.00289.2021.
- 375 4. Obacz, J., Yung, H., Shamseddin, M., Linnane, E., Liu, X., Azad, A.A., Rassl, D.M.,  
376 Fairen-Jimenez, D., Rintoul, R.C., Nikolić, M.Z., et al. (2021). Biological basis for  
377 novel mesothelioma therapies. Preprint, 10.1038/s41416-021-01462-2  
378 10.1038/s41416-021-01462-2.
- 379 5. Boutin, C., Schlessler, M., Frenay, C., and Astoul, P. (1998). Malignant pleural  
380 mesothelioma. *European Respiratory Journal* *12*. 10.1183/09031936.98.12040972.
- 381 6. Manzo, G. (2019). Similarities between embryo development and cancer process  
382 suggest new strategies for research and therapy of tumors: A new point of view. *Front*  
383 *Cell Dev Biol* *7*. 10.3389/fcell.2019.00020.
- 384 7. Rehrauer, H., Wu, L., Blum, W., Pecze, L., Henzi, T., Serre-Beinier, V., Aquino, C.,  
385 Vrugt, B., De Perrot, M., Schwaller, B., et al. (2018). How asbestos drives the tissue  
386 towards tumors: YAP activation, macrophage and mesothelial precursor recruitment,  
387 RNA editing, and somatic mutations. *Oncogene* *37*. 10.1038/s41388-018-0153-z.
- 388 8. Huang, J., Chan, S.C., Pang, W.S., Chow, S.H., Lok, V., Zhang, L., Lin, X., Lucero-  
389 Prisno, D.E., Xu, W., Zheng, Z.J., et al. (2023). Global Incidence, Risk Factors, and  
390 Temporal Trends of Mesothelioma: A Population-Based Study. *Journal of Thoracic*  
391 *Oncology* *18*. 10.1016/j.jtho.2023.01.095.
- 392 9. Gueugnon, F., Leclercq, S., Blanquart, C., Sagan, C., Cellerin, L., Padiou, M.,  
393 Perigaud, C., Scherpereel, A., and Gregoire, M. (2011). Identification of novel markers  
394 for the diagnosis of malignant pleural mesothelioma. *American Journal of Pathology*  
395 *178*. 10.1016/j.ajpath.2010.12.014.
- 396 10. Ricciardi, S., Cardillo, G., Zirafa, C.C., Carleo, F., Facciolo, F., Fontanini, G., Mutti,  
397 L., and Melfi, F. (2018). Surgery for malignant pleural mesothelioma: An international  
398 guidelines review. Preprint, 10.21037/jtd.2017.10.16 10.21037/jtd.2017.10.16.

- 399 11. Cano, E., Carmona, R., and Muñoz-Chápuli, R. (2013). Wt1-expressing progenitors  
400 contribute to multiple tissues in the developing lung. *Am J Physiol Lung Cell Mol*  
401 *Physiol* 305. 10.1152/ajplung.00424.2012.
- 402 12. Sontake, V., Kasam, R.K., Sinner, D., Korfhagen, T.R., Reddy, G.B., White, E.S.,  
403 Jegga, A.G., and Madala, S.K. (2018). Wilms' tumor 1 drives fibroproliferation and  
404 myofibroblast transformation in severe fibrotic lung disease. *JCI Insight* 3.  
405 10.1172/jci.insight.121252.
- 406 13. Gilbert, R.M., Schappell, L.E., and Gleghorn, J.P. (2021). Defective mesothelium and  
407 limited physical space are drivers of dysregulated lung development in a genetic model  
408 of congenital diaphragmatic hernia. *Development (Cambridge)* 148.  
409 10.1242/DEV.199460.
- 410 14. Mutsaers, S.E., McAnulty, R.J., Laurent, G.J., Versnel, M.A., Whitaker, D., and  
411 Papadimitriou, J.M. (1997). Cytokine regulation of mesothelial cell proliferation in  
412 vitro and in vivo. *Eur J Cell Biol* 72.
- 413 15. Kumar-Singh, S., Weyler, J., Martin, M.J.H., Vermeulen, P.B., and Van Marck, E.  
414 (1999). Angiogenic cytokines in mesothelioma: A study of VEGF, FGF-1 and -2, and  
415 TGF $\beta$  expression. *Journal of Pathology* 189. 10.1002/(SICI)1096-  
416 9896(199909)189:1<72::AID-PATH401>3.0.CO;2-0.
- 417 16. Namvar, S., Woolf, A.S., Zeef, L.A.H., Wilm, T., Wilm, B., and Herrick, S.E. (2018).  
418 Functional molecules in mesothelial-to-mesenchymal transition revealed by  
419 transcriptome analyses. *Journal of Pathology* 245. 10.1002/path.5101.
- 420 17. Weaver, M., Yingling, J.M., Dunn, N.R., Bellusci, S., and Hogan, B.L. (1999). Bmp  
421 signaling regulates proximal-distal differentiation of endoderm in mouse lung  
422 development. *Development* 126, 4005–4015.
- 423 18. Weaver, M., Dunn, N.R., and Hogan, B.L. (2000). Bmp4 and Fgf10 play opposing  
424 roles during lung bud morphogenesis. *Development* 127, 2695–2704.
- 425 19. Dixit, R., Ai, X., and Fine, A. (2013). Derivation of lung mesenchymal lineages from  
426 the fetal mesothelium requires hedgehog signaling for mesothelial cell entry.  
427 *Development* 140, 4398–4406. 10.1242/dev.098079.
- 428 20. Shimamura, Y., Tanaka, J., Kakiuchi, M., Sarmah, H., Miura, A., Hwang, Y., Sawada,  
429 A., Ninish, Z., Yamada, K., Cai, J.J., et al. (2022). A developmental program that  
430 regulates mammalian organ size offsets evolutionary distance. *bioRxiv*.  
431 10.1101/2022.10.19.512107.
- 432 21. McGeady, T.A., Quinn, P.J., Fitzpatrick, E.S., Ryan, M.T., Kilroy, D., and Lonergan,  
433 P. (2017). *Veterinary Embryology*.
- 434 22. Kienzle, A., Servais, A.B., Ysasi, A.B., Gibney, B.C., Valenzuela, C.D., Wagner,  
435 W.L., Ackermann, M., and Mentzer, S.J. (2018). Free-floating mesothelial cells in  
436 pleural fluid after lung surgery. *Front Med (Lausanne)* 5. 10.3389/fmed.2018.00089.

- 437 23. Mierzejewski, M., Paplinska-Goryca, M., Korczynski, P., and Krenke, R. (2021).  
438 Primary human mesothelial cell culture in the evaluation of the inflammatory response  
439 to different sclerosing agents used for pleurodesis. *Physiol Rep* 9.  
440 10.14814/phy2.14846.
- 441 24. Kawai, N., Ouji, Y., Sakagami, M., Tojo, T., Sawabata, N., Yoshikawa, M., and  
442 Taniguchi, S. (2019). Isolation and culture of pleural mesothelial cells. *Exp Lung Res*  
443 45. 10.1080/01902148.2018.1511002.
- 444 25. Pruett, N., Singh, A., Shankar, A., Schrupp, D.S., and Hoang, C.D. (2020). Normal  
445 mesothelial cell lines newly derived from human pleural biopsy explants. *Am J*  
446 *Physiol Lung Cell Mol Physiol* 319. 10.1152/AJPLUNG.00141.2020.
- 447 26. Saed, G.M., Zhang, W., Chegini, N., Holmdahl, L., and Diamond, M.P. (1999).  
448 Alteration of type I and III collagen expression in human peritoneal mesothelial cells  
449 in response to hypoxia and transforming growth factor- $\beta$ 1. *Wound Repair and*  
450 *Regeneration* 7. 10.1046/j.1524-475X.1999.00504.x.
- 451 27. Breborowicz, A., Korybalska, K., Grzybowski, A., Wieczorowska-Tobis, K., Martis,  
452 L., and Oreopoulos, D.G. (1996). Synthesis of hyaluronic acid by human peritoneal  
453 mesothelial cells: Effect of cytokines and dialysate. *Peritoneal Dialysis International*  
454 16. 10.1177/089686089601600410.
- 455 28. Davidenko, N., Schuster, C.F., Bax, D. V., Farndale, R.W., Hamaia, S., Best, S.M.,  
456 and Cameron, R.E. (2016). Evaluation of cell binding to collagen and gelatin: a study  
457 of the effect of 2D and 3D architecture and surface chemistry. *J Mater Sci Mater Med*  
458 27. 10.1007/s10856-016-5763-9.
- 459 29. Östman, A. (2017). PDGF receptors in tumor stroma: Biological effects and  
460 associations with prognosis and response to treatment. Preprint,  
461 10.1016/j.addr.2017.09.022 10.1016/j.addr.2017.09.022.
- 462 30. He, P., Lim, K., Sun, D., Pett, J.P., Jeng, Q., Polanski, K., Dong, Z., Bolt, L.,  
463 Richardson, L., Mamanova, L., et al. (2022). A human fetal lung cell atlas uncovers  
464 proximal-distal gradients of differentiation and key regulators of epithelial fates. *Cell*  
465 185, 4841-4860.e25. 10.1016/J.CELL.2022.11.005.
- 466 31. Negretti, N.M., Plosa, E.J., Benjamin, J.T., Schuler, B.A., Habermann, A.C., Jetter,  
467 C.S., Gulleman, P., Bunn, C., Hackett, A.N., Ransom, M., et al. (2021). A single-cell  
468 atlas of mouse lung development. *Development* 148. 10.1242/dev.199512.
- 469 32. Ornitz, D.M., and Itoh, N. (2001). Fibroblast growth factors. Preprint, 10.1007/978-3-  
470 662-46875-3\_2175 10.1007/978-3-662-46875-3\_2175.
- 471 33. Lebeche, D., Malpel, S., and Cardoso, W. V (1999). Fibroblast growth factor  
472 interactions in the developing lung. *Mech Dev* 86, 125–136.

- 473 34. Yuan, T., Volckaert, T., Chanda, D., Thannickal, V.J., and De Langhe, S.P. (2018).  
474 Fgf10 Signaling in Lung Development, Homeostasis, Disease, and Repair After Injury.  
475 Preprint, 10.3389/fgene.2018.00418 10.3389/fgene.2018.00418.
- 476 35. Travis WD Müller-Hermelink HK, B.E. (2004). Pathology and Genetics: Tumours of  
477 the Lung, Pleura, Thymus and Heart. International agency for research on cancer 1.
- 478 36. Koopmans, T., and Rinkevich, Y. (2018). Mesothelial to mesenchyme transition as a  
479 major developmental and pathological player in trunk organs and their cavities.  
480 Preprint, 10.1038/s42003-018-0180-x 10.1038/s42003-018-0180-x.
- 481 37. Perantoni, A.O., Dove, L.F., and Karavanova, I. (1995). Basic fibroblast growth factor  
482 can mediate the early inductive events in renal development. Proc Natl Acad Sci U S A  
483 92. 10.1073/pnas.92.10.4696.
- 484 38. Dudley, A.T., Godin, R.E., and Robertson, E.J. (1999). Interaction between FGF and  
485 BMP signaling pathways regulates development of metanephric mesenchyme. Genes  
486 Dev 13. 10.1101/gad.13.12.1601.
- 487 39. Schelch, K., Wagner, C., Hager, S., Pirker, C., Siess, K., Lang, E., Lin, R., Kirschner,  
488 M.B., Mohr, T., Brcic, L., et al. (2018). FGF2 and EGF induce epithelial-mesenchymal  
489 transition in malignant pleural mesothelioma cells via a MAPKinase/MMP1 signal.  
490 Carcinogenesis 39. 10.1093/carcin/bgy018.
- 491 40. García-Domínguez, C.A., Martínez, N., Gragera, T., Pérez-Rodríguez, A., Retana, D.,  
492 León, G., Sánchez, A., Oliva, J.L., Pérez-Sala, D., and Rojas, J.M. (2011). Sprouty2  
493 and spred1-2 proteins inhibit the activation of the ERK pathway elicited by  
494 cyclopentenone prostanoids. PLoS One 6. 10.1371/journal.pone.0016787.
- 495 41. Ichise, T., Yoshida, N., and Ichise, H. (2014). FGF2-induced Ras-MAPK signalling  
496 maintains lymphatic endothelial cell identity by upregulating endothelial-cell-specific  
497 gene expression and suppressing TGF $\beta$  signalling through Smad2. J Cell Sci 127.  
498 10.1242/jcs.137836.
- 499 42. Tan, Y., Qiao, Y., Chen, Z., Liu, J., Guo, Y., Tran, T., Tan, K. Sen, Wang, D.Y., and  
500 Yan, Y. (2020). FGF2, an Immunomodulatory Factor in Asthma and Chronic  
501 Obstructive Pulmonary Disease (COPD). Preprint, 10.3389/fcell.2020.00223  
502 10.3389/fcell.2020.00223.
- 503 43. Stahl, M., and Tallman, M.S. (2019). Acute promyelocytic leukemia (APL): remaining  
504 challenges towards a cure for all. Preprint, 10.1080/10428194.2019.1613540  
505 10.1080/10428194.2019.1613540.
- 506 44. Shelton, E.L., Galindo, C.L., Williams, C.H., Pfaltzgraff, E., Hong, C.C., and Bader,  
507 D.M. (2013). Autotaxin Signaling Governs Phenotypic Heterogeneity in Visceral and  
508 Parietal Mesothelia. PLoS One 8. 10.1371/journal.pone.0069712.

- 509 45. Blum, W., Pecze, L., Felley-Bosco, E., and Schwaller, B. (2015). Overexpression or  
510 absence of calretinin in mouse primary mesothelial cells inversely affects proliferation  
511 and cell migration. *Respir Res* 16. 10.1186/s12931-015-0311-6.  
512  
513  
514



## 515 **Figure Legends**

### 516 **Figure 1. Isolation of Mesothelial cell progenitors (MPCs) from pig fetuses. (A)**

517 Schematic illustration of pig MPC isolation: The embryonic thorax (middle panel in A) was  
518 isolated from E80 pig fetuses (left panel in A) and treated with the following procedures. (i)  
519 scraping MPCs followed by trypsinization with 0.05% trypsin in the tube: (ii) trypsinization  
520 with 0.05% trypsin directly on the thorax. In both methods, the mesothelial cell was  
521 neutralized with DMEM + 10% FBS, followed by PBS washing and filtration with a cell  
522 strainer to remove the residual connective tissue. The trypsinization on the porcine thorax (ii)  
523 method showed a higher yield of MPC expansion than the scraping method (i) (right panels  
524 in A). (B) Graphs: quantitative qRT-PCR (RT-qPCR) analysis of type I collagen (*COL1A1*),  
525 integrin beta-1 (*ITGB1*), and *CD44* cultured in a basal culture medium. Error bars represent  
526 mean  $\pm$  SD. Each plot showed different biological replicates (n = 3). Each gene expression  
527 was normalized with the housekeeping gene (*GAPDH*) expression. (C) Representative phase  
528 contrast images of MPCs isolated from E80 pig thorax cultured on different cell culture dish  
529 coating conditions. Col I: type I collagen coating, HA: hyaluronic acid coating, Non: non-  
530 coating. (D) Graphs: Quantification of the isolated pig MPC number per each field. Each plot  
531 showed different biological replicates (n = 3). (E) Representative immunofluorescence (IF)  
532 image of MPC after 3 days of culture. Red: WT1, Green:  $\alpha$ -SMA, Blue: DAPI. Scale bars:  
533 (A) 1 cm, (C) 100  $\mu$ m, (E) 20  $\mu$ m. \* $p$ <0.05, \*\*\*\* $p$ <0.0001, ns: no significant difference by  
534 one-way ANOVA test and t-test in (D).

535

### 536 **Figure 2. MPC self-renewal by FGF2, PDGF-BB stimulation. (A)**

537 Representative IF images of MPCs after 3 days of treatment with FGF2, PDGF, SU5404 (FGF signaling  
538 inhibitor, SU), a CP673451 (PDGF signaling inhibitor, CP), or Control (no treatment). FGF2  
539 and PDGF-BB showed more cell numbers per field. WT1 (red), Ki67 (blue), DAPI (grey).  
540 Arrows (white): WT1<sup>+</sup>Ki67<sup>+</sup> cells. (B) Graph: Quantification of cell numbers per field with  
541 each marker from IF images in (A). (n = 4) (C-F) Graphs: quantification of cell number from  
542 IF images with total cell number (C), WT1<sup>+</sup> cell number (D), Ki67<sup>+</sup> proliferative cell number  
543 (E), and proportion of WT1<sup>+</sup>Ki67<sup>+</sup> proliferative MPCs (F). Error bars represent mean  $\pm$  SD.  
544 Each plot showed different biological replicates (n = 4). (G-I) Graphs: RT-qPCR analysis of  
545 *WT1* mRNA expression after 3 days of culture with FGF2, PDGF-BB, SU, and CP (G). *WT1*  
546 mRNA expression during long-term culture by FGF2 (H) and PDGF-BB treatment (I). Error  
547 bars represent mean  $\pm$  SD. Each plot showed different biological replicates (n = 3). Relative  
548 mRNA expression of each gene was normalized with the control basal culture condition.  
549 Scale bars = 20  $\mu$ m. \* $p$ < 0.05, \*\* $p$ <0.01, \*\*\* $p$ <0.001, \*\*\*\* $p$ <0.0001, ns: no significant  
550 difference by one-way ANOVA test and t-test in (C-F).

551

552

553 **Figure 3. MPC differentiation into  $\alpha$ -SMA<sup>+</sup> smooth muscle cell by BMP4 stimulation.**

554 (A) Representative IF images of MPC after 3 days of treatment with BMP4, dorsomorphin  
555 (BMP signaling inhibitor, Dor), or Control (no treatment). BMP4 induced  $\alpha$ -SMA expression,  
556 while a Dor reduced its expression. WT1 (red),  $\alpha$ -SMA (green), Ki67 (blue), and DAPI  
557 (grey). Arrows (white): WT1<sup>+</sup> $\alpha$ -SMA<sup>+</sup> cells, asterisks: WT1<sup>+</sup>Ki67<sup>+</sup> $\alpha$ -SMA<sup>+</sup> cells, arrowhead  
558 (white): WT1<sup>-</sup> $\alpha$ -SMA<sup>+</sup> cells. (B-C) Graphs: RT-qPCR analysis of *WT1* and  *$\alpha$ -SMA* mRNA  
559 expression for 3 days of MPCs culture with BMP4, Dor, or Control (B) and long-term culture  
560 (C). Error bars represent mean  $\pm$  SD. Each plot showed different biological replicates (n = 3).  
561 Relative mRNA expression of each gene was normalized with the control basal culture  
562 condition. (D) Quantification of cell numbers per field with each marker from IF images in  
563 (A). (E-I) Quantification of cell number from IF with  $\alpha$ -SMA<sup>+</sup> cell proportion (E), total cell  
564 number(F), WT1<sup>+</sup> cell proportion (G), Ki67<sup>+</sup> proliferating cell number (H), the proportion of  
565 WT1<sup>+</sup> $\alpha$ -SMA<sup>+</sup> primed cells in WT1<sup>+</sup> cells (I), WT1<sup>-</sup> $\alpha$ -SMA<sup>+</sup> cells in SMA<sup>+</sup> cells (J), and  
566 WT1<sup>+</sup> $\alpha$ -SMA<sup>+</sup> cells in  $\alpha$ -SMA<sup>+</sup> cells (K). Error bars represent mean  $\pm$  SD. Each plot showed  
567 different biological replicates (n = 4). Scale bars = 20  $\mu$ m. \*p<0.05, \*\*p<0.01, \*\*\*p<0.001,  
568 \*\*\*\*p<0.0001, ns: no significant difference by one-way ANOVA test and t-test in (B, C, E-  
569 K).

570

571 **Figure 4. FGF2 and PDGF suppressed MPC differentiation into smooth muscle cells.**

572 (A-B) Graphs: RT-qPCR analysis of  $\alpha$ -SMA.  *$\alpha$ -SMA* mRNA expression after 3 days of MPCs  
573 culture with FGF2, PDGF-BB, BMP4, and its inhibitors (SU, CP, Dor) (A) and long-term  
574 culture of MPCs with FGF2, PDGF-BB (B). Error bars represent mean  $\pm$  SD. Each plot  
575 showed different biological replicates (n = 3). Relative mRNA expression of each gene was  
576 normalized with the control basal culture condition. (C-E) Graphs: Quantification of cell  
577 proportion from IF of MPCs (from **Figure 2, 3**) with  $\alpha$ -SMA<sup>+</sup> cell proportion (C), proportion  
578 of WT1<sup>+</sup> $\alpha$ -SMA<sup>+</sup> cells in WT1<sup>+</sup> cells (D), and proportion of Ki67<sup>+</sup> $\alpha$ -SMA<sup>+</sup> cells in  $\alpha$ -SMA<sup>+</sup>  
579 cells (E). Error bars represent mean  $\pm$  SD. Each plot showed different biological replicates (n  
580 = 4) (F) Schematic summary of MPC self-renewal and differentiation into SMC by FGF2,  
581 PDGF-BB, and BMP4. \*\*p<0.01, \*\*\*p<0.001, \*\*\*\*p<0.0001, ns: no significant difference  
582 by one-way ANOVA test and t-test in (A-E)

583

584 **Figure 5. The dominance of FGF2 effect over BMP signaling in MPC pool regulation.**

585 (A-B) Graphs: RT-qPCR analysis of WT1 and  *$\alpha$ -SMA* mRNA expression of MPC culture  
586 with signaling molecules and its combination during 3 days of culture (A) and long-term  
587 culture (B). (C) Graph: Quantification of cell numbers per field with each marker from IF  
588 images. (n = 4) (D-G) Graphs: quantification of cell number from IF with total cell number  
589 (D), WT1<sup>+</sup> cells (E), Ki67<sup>+</sup> cells (F), and  $\alpha$ -SMA<sup>+</sup> cells (G). (n = 4) (H-I) Graphs: proportion

590 of  $WT1^+\alpha\text{-SMA}^+$  cells in  $WT1^+$  cells (H), proportion of  $WT1^+\alpha\text{-SMA}^+$  cells in  $\alpha\text{-SMA}^+$  cells  
591 (I). Error bars represent mean  $\pm$  SD. Each plot showed different biological replicates ( $n = 4$ )  
592 Scale bars = 20  $\mu\text{m}$ . \* $p < 0.05$ , \*\* $p < 0.01$ , \*\*\*\* $p < 0.0001$ , ns: no significant difference by one-  
593 way ANOVA test and t-test in (A-I).

594

595 **Figure 6.  $\beta$ -catenin (wnt) activation induced the maturation of MPCs to  $CALB2^+$**   
596 **mature mesothelial cells.** (A-B) Graphs: RT-qPCR analysis of *WT1*,  *$\alpha$ -SMA*, *CALB2*, and  
597 *MSLN* mRNA expression for long-term culture of MPC treatment with CHIR99021 (CHIR)  
598 (A), and FGF2, BMP4 (B). Error bars represent mean  $\pm$  SD. Each plot showed different  
599 biological replicates ( $n = 3$ ). Relative mRNA expression of each gene was normalized with  
600 the control basal culture condition. (C) Representative IF images of MPCs after 3 days of  
601 treatment with BMP4 and CHIR.  $CALB2$  (red), DAPI (blue). (C) Graph: quantification of  
602  $CALB2^+$  cell number from IF. Error bars represent mean  $\pm$  SD. Each plot showed different  
603 biological replicates ( $n = 4$ ). Scale bars = 20  $\mu\text{m}$ . \* $p < 0.05$ , \*\* $p < 0.01$ , \*\*\* $p < 0.001$ ,  
604 \*\*\*\* $p < 0.0001$ , ns: no significant difference by one-way ANOVA test and t-test in (A, B, D).

605

606 **Figure 7. Schematic model of embryonic pig MPC cell behavior control by intertwined**  
607 **signaling.** FGF2 induces self-renewal of  $WT1^+$  MPC. MPC differentiates into  $\alpha\text{-SMA}^+$  SMC  
608 through primed  $WT1^+\alpha\text{-SMA}^+$  cells by BMP4 stimulation. FGF and PDGF signaling  
609 suppresses the BMP4-mediated SMC differentiation. Developing mesothelium shows stage-  
610 specific markers: high  $WT1$  expression in the early pseudoglandular stage of porcine lung  
611 development and low  $WT1$  expression and  $CALB2$  expression in the calanlicular~alveolar  
612 stage. Wnt activation by CHIR facilitates the MPC maturation process. The role of  $WT1^+\alpha\text{-SMA}^+$   
613 unknown pools in MPC proliferation and differentiation is unclear.

614

615 **Figure 1.**

(A)

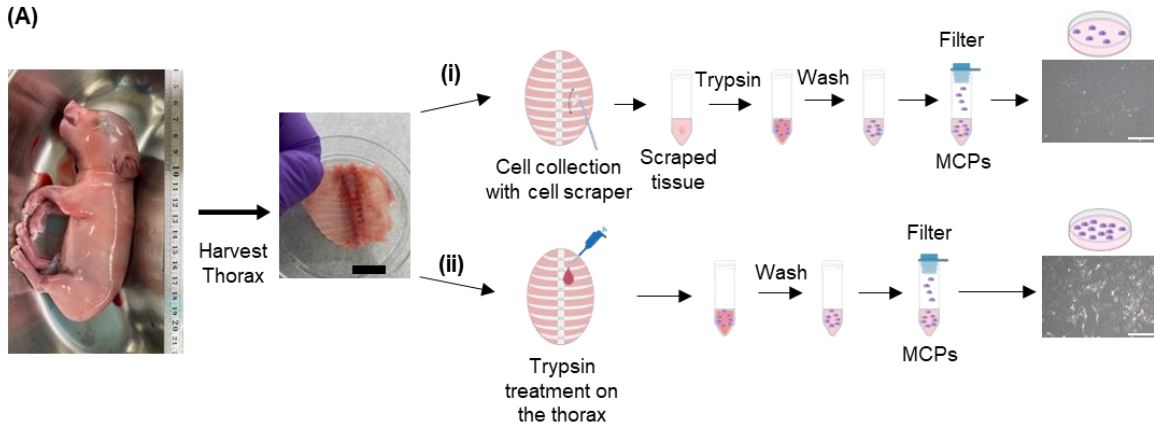

(B)

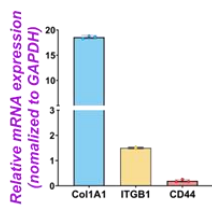

(C)

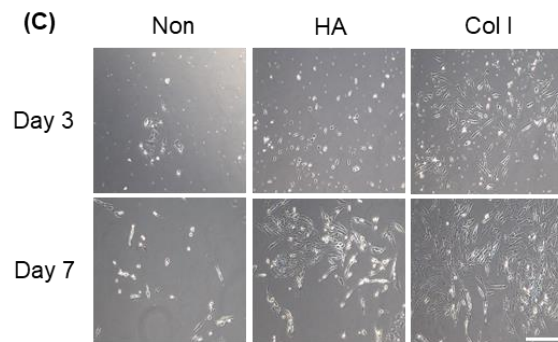

(D)

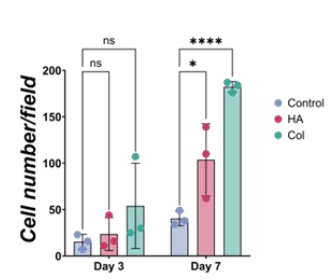

(E)

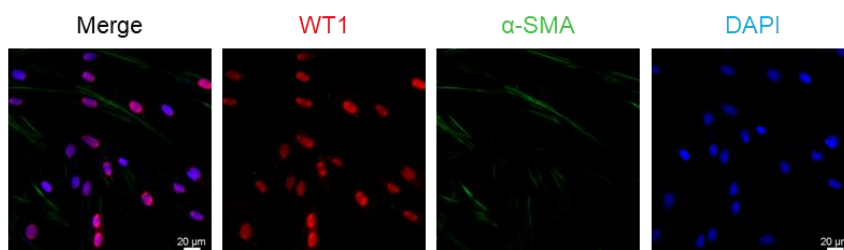

616

617

618

619 **Figure 2.**

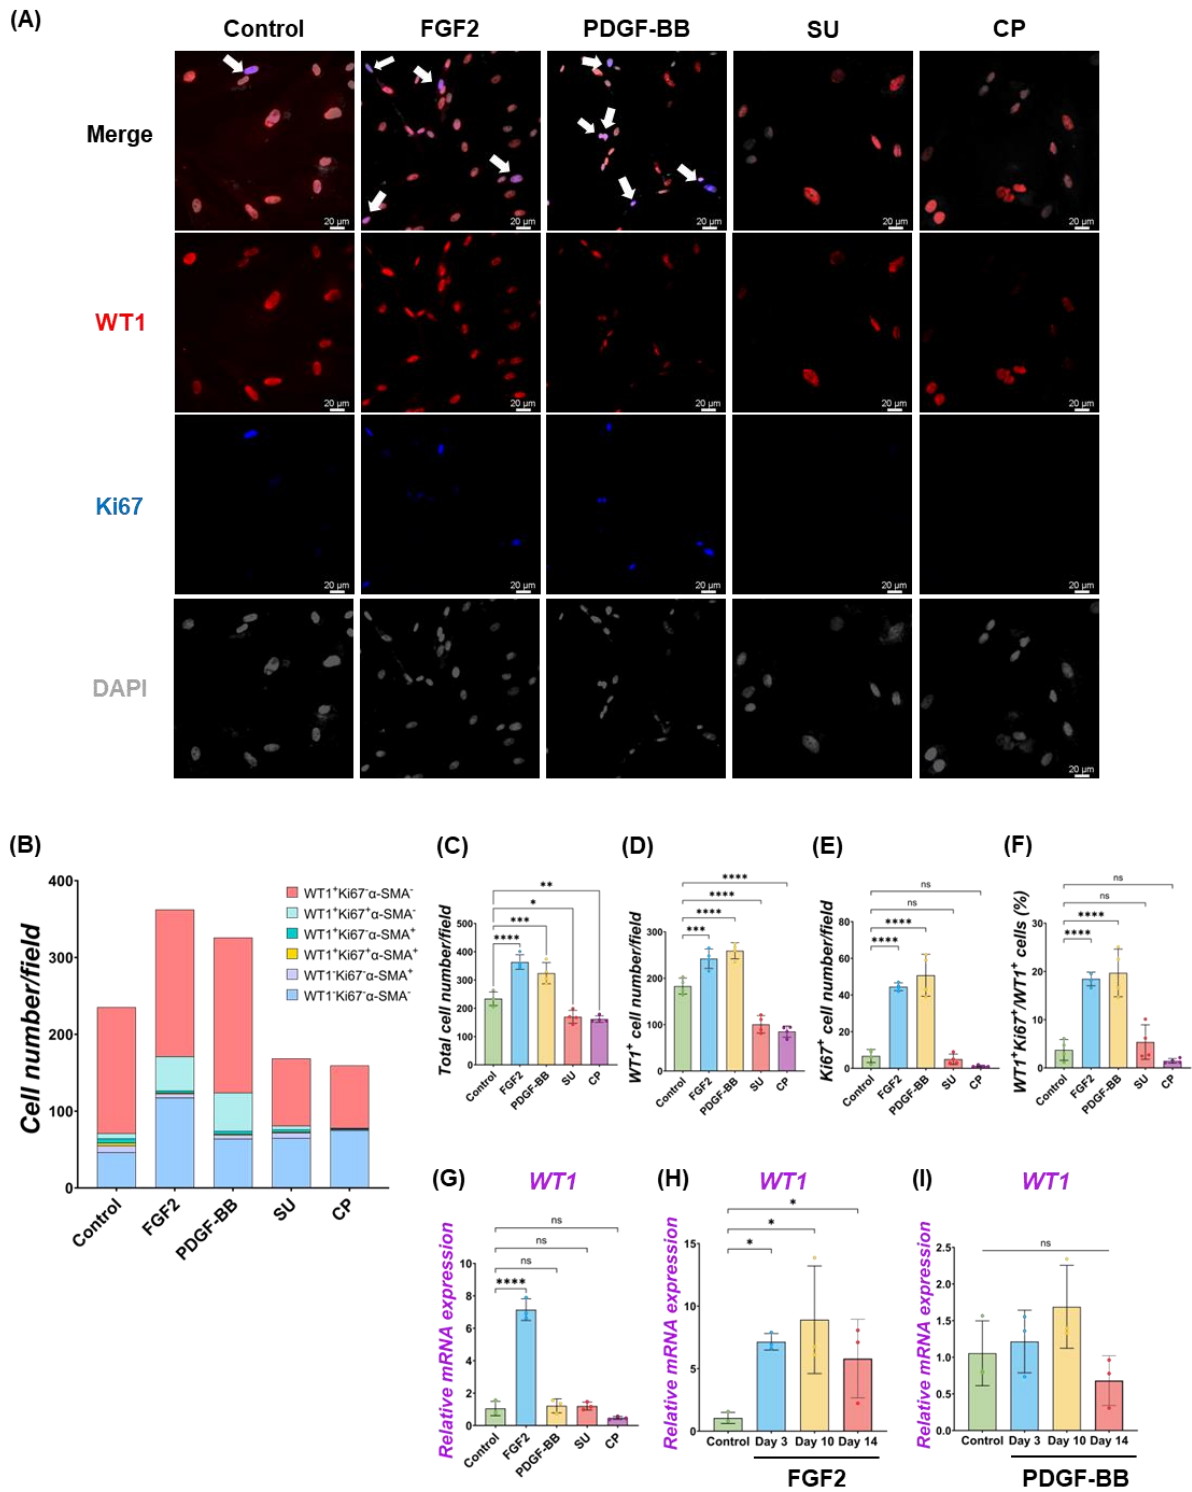

620

621

622 **Figure 3.**

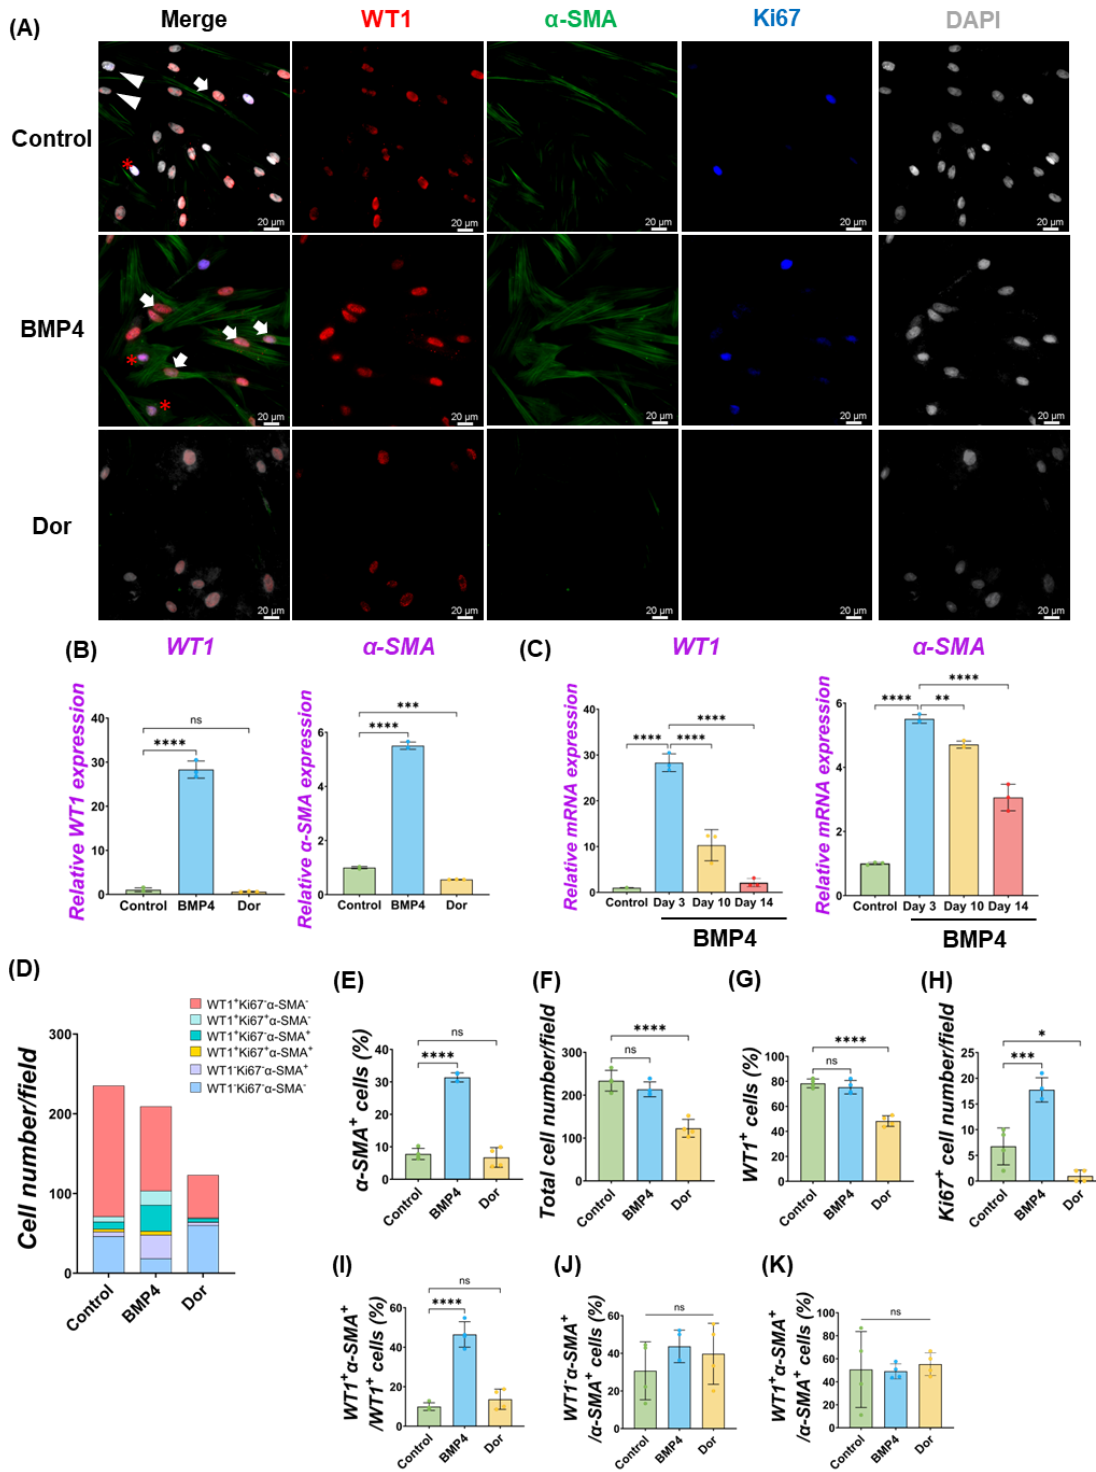

623

624

625 **Figure 4.**

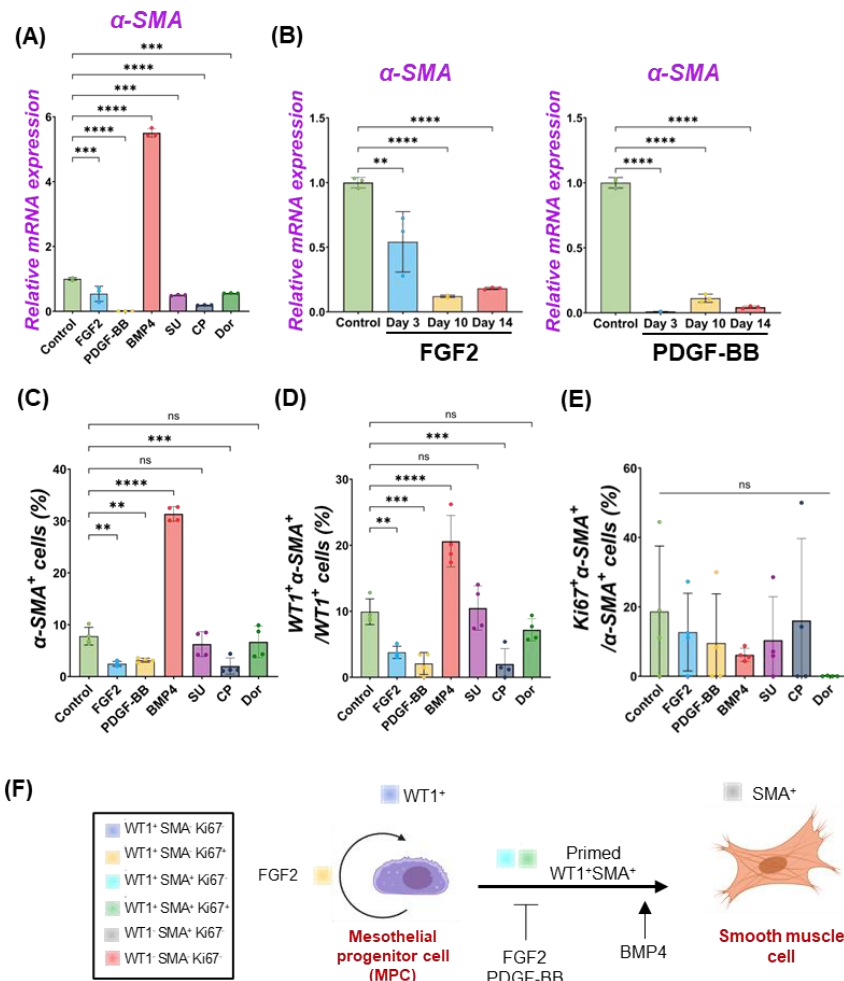

626

627

628 **Figure 5.**

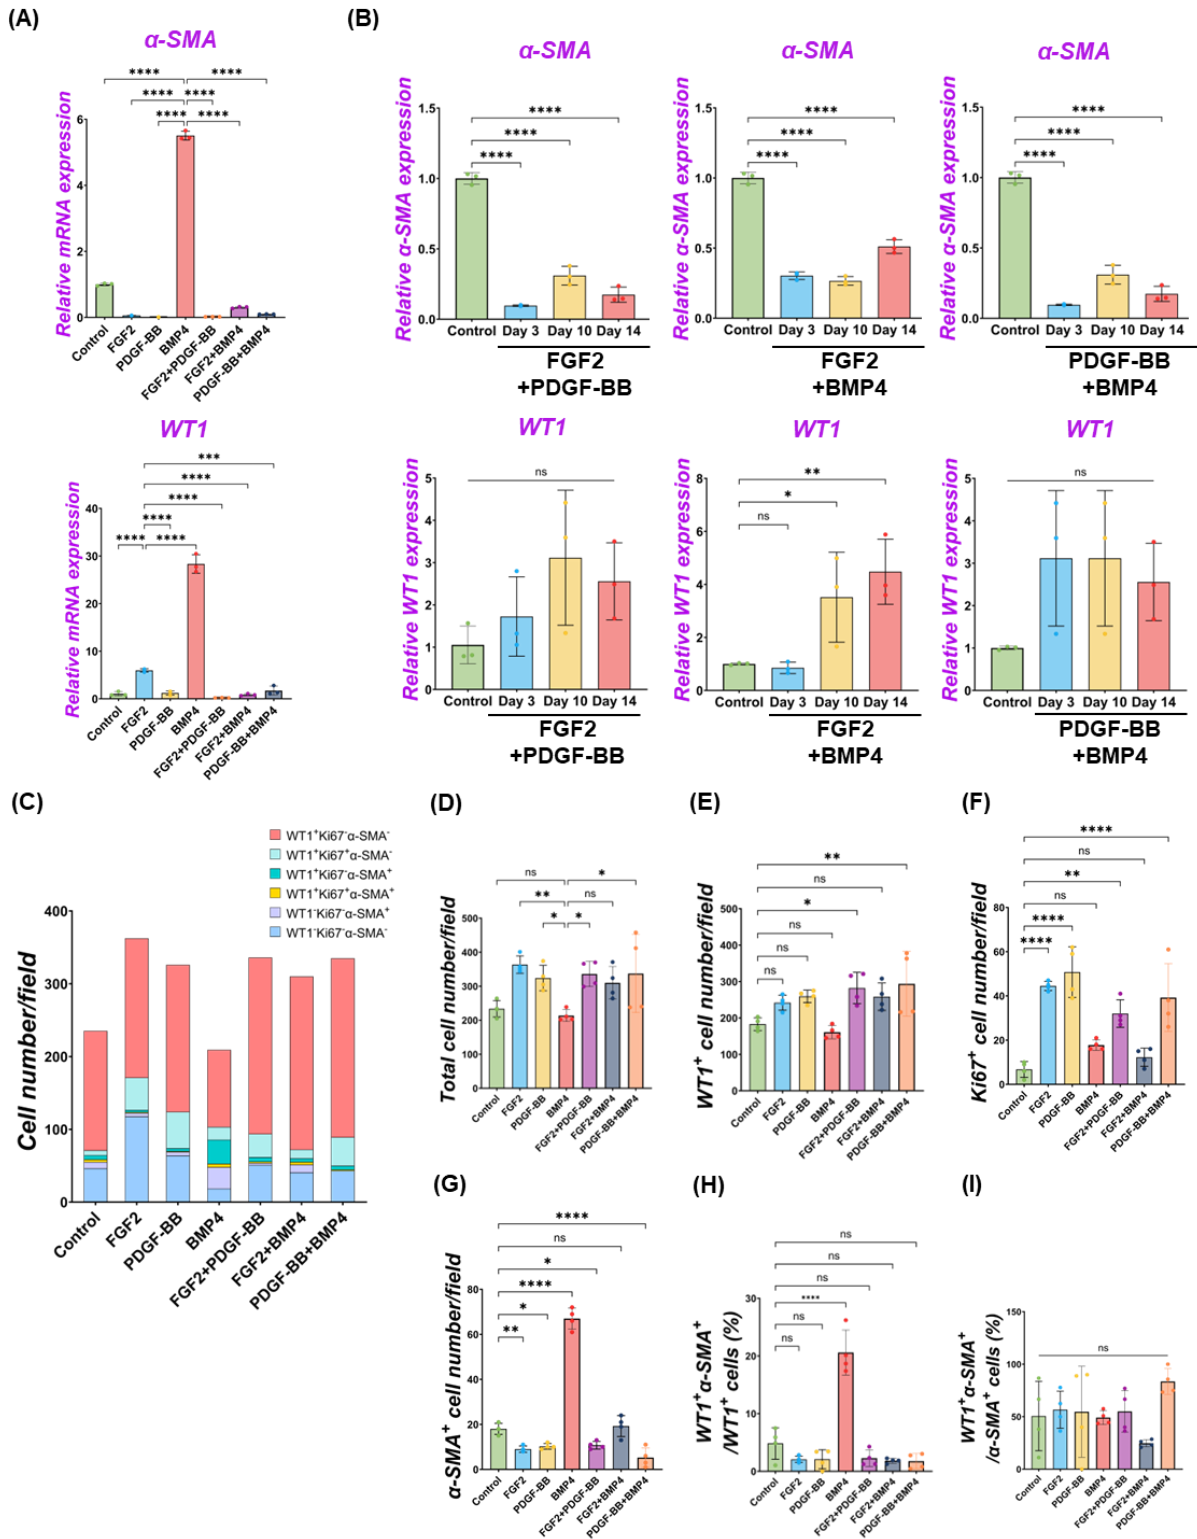

629

630



631 **Figure 6.**

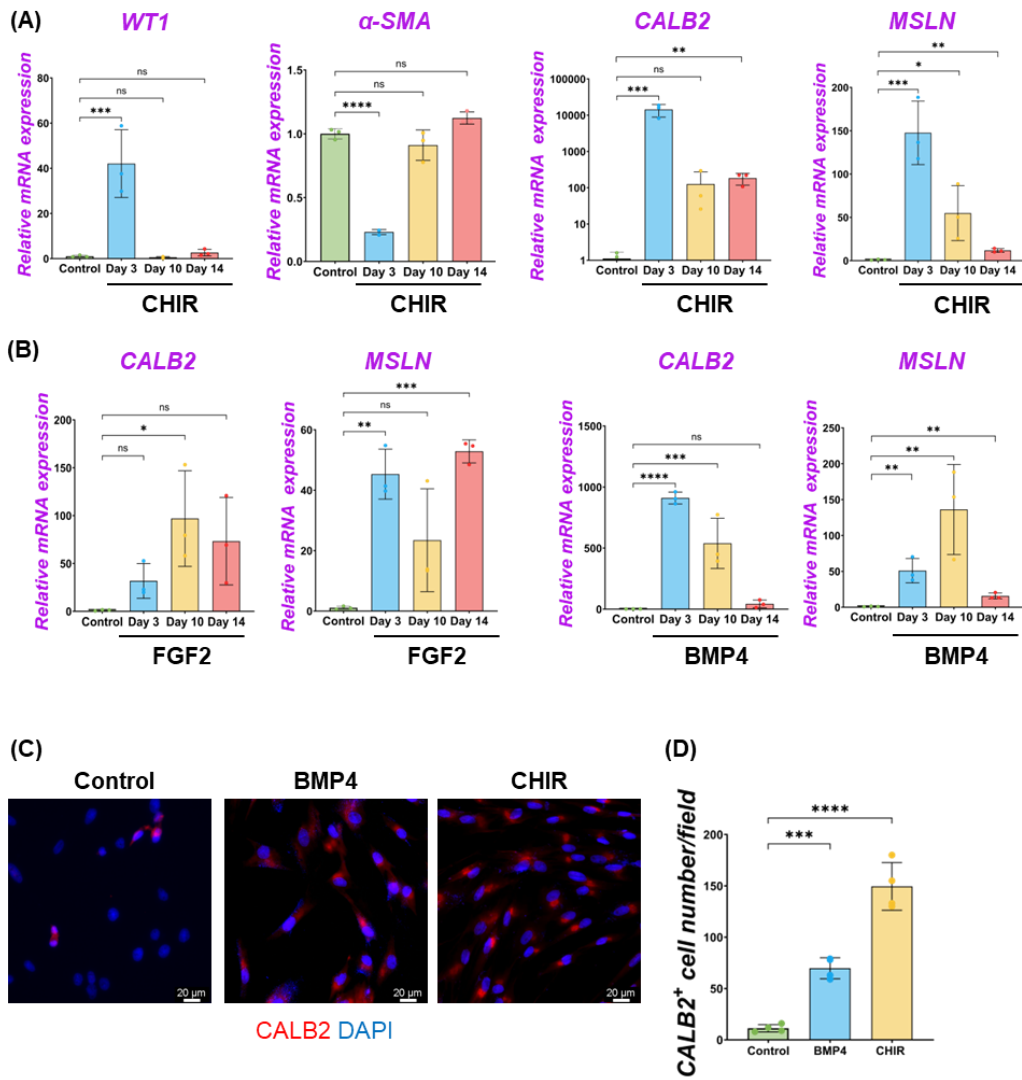

632

633

634 **Figure 7.**

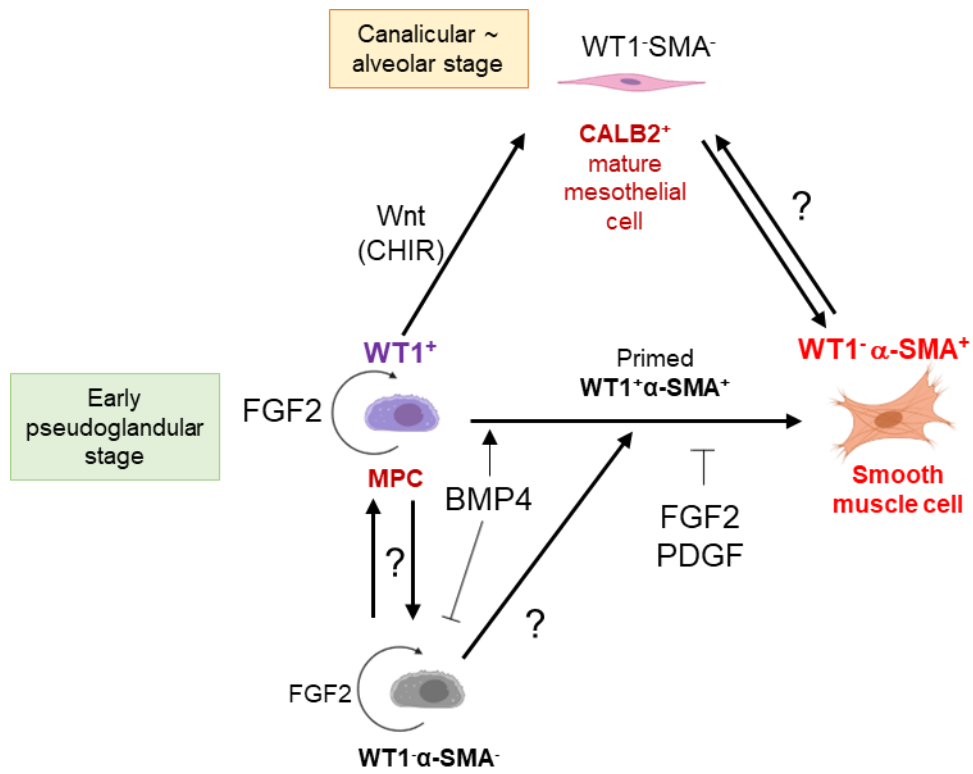

635

636 **STAR★Methods**

637 **Key resources table**

638

| REAGENT or RESOURCE                                  | SOURCE                      | IDENTIFIER                                         |
|------------------------------------------------------|-----------------------------|----------------------------------------------------|
| <b>Antibodies</b>                                    |                             |                                                    |
| Rabbit anti-WT1                                      | Proteintech                 | Cat#12609-1-AP<br><a href="#">RRID:AB_2216225</a>  |
| Mouse anti- $\alpha$ -SMA                            | Bio-Rad                     | Cat#MCA5781GA<br><a href="#">RRID:AB_3076452</a>   |
| Chicken anti-Ki-67                                   | Novus Biologicals           | Cat#NBP3-05538<br><a href="#">RRID:AB_3076453</a>  |
| Mouse anti-calretinin (2D7A9)                        | Thermo Fisher Scientific    | Cat#66496<br><a href="#">RRID:AB_2664066</a>       |
| Chicken anti-calretinin                              | EnCor Biotechnology         | Cat#CPCA-Calret<br><a href="#">RRID:AB_2572241</a> |
| Rabbit anti-cleaved caspase-3 (Asp175)               | Cell Signaling              | Cat#9661<br><a href="#">RRID:AB_2341188</a>        |
| Rabbit anti-mesothelin (D9R5G)                       | Cell Signaling              | Cat#99966<br><a href="#">RRID:AB_2800323</a>       |
| Rabbit anti-mesothelin (SP74)                        | Abcam                       | Cat#93620<br><a href="#">RRID:AB_10563844</a>      |
| Mouse anti-mesothelin (MSLN/2131)                    | Novus Biologicals           | Cat#NBP2-79724<br><a href="#">RRID:AB_3076454</a>  |
| Donkey anti-mouse Alexa 488                          | Invitrogen                  | Cat#A21202<br><a href="#">RRID:AB_141607</a>       |
| Donkey anti-mouse Alexa 647                          | Invitrogen                  | Cat#A10042<br><a href="#">RRID:AB_2534017</a>      |
| Donkey anti-rabbit Alexa 568                         | Invitrogen                  | Cat#A31571<br><a href="#">RRID:AB_162542</a>       |
| Donkey anti-chicken Alexa 488                        | Jackson ImmunoResearch Labs | Cat#703-545-155<br><a href="#">RRID:AB_2340375</a> |
| Goat anti-chicken HRP                                | Invitrogen                  | Cat#A16054<br><a href="#">RRID:AB_2534727</a>      |
| <b>Chemicals, peptides, and recombinant proteins</b> |                             |                                                    |
| Cy3 tyramide                                         | AAT Bioquest                | Cat#11065                                          |
| RBC Lysis Buffer (10x)                               | Biolegend                   | Cat#420301                                         |
| NucBlue™ Live ReadyProbes™ Reagent (Hoechst 33342)   | Invitrogen                  | Cat#R37605                                         |
| rhEGF                                                | R&D Systems                 | Cat#236-EG                                         |
| rhFGF-basic                                          | PeproTech                   | Cat#100-18B                                        |
| SU5402                                               | MedChem Express             | Cat#HY-10407                                       |
| rhPDGF-BB                                            | R&D Systems                 | Cat#220-BB                                         |
| CP673451                                             | MedChem Express             | Cat#HY-12050                                       |
| rhBMP4                                               | R&D Systems                 | Cat#314-BP                                         |
| Dorsomorphin                                         | Tocris                      | Cat#3093                                           |
| CHIR99021                                            | MedChem Express             | Cat#HY-10182                                       |
| Ascorbic acid                                        | Fisher Chemical             | Cat#FLA61100                                       |
| Retinoic acid                                        | Sigma-Aldrich               | Cat#R2625                                          |
| Purmorphamine                                        | Tocris                      | Cat#4551                                           |
| <b>Critical commercial assays</b>                    |                             |                                                    |
| PrimeScript RT Master Mix (Perfect Real time)        | Takara Bio                  | Cat#RR036B                                         |

|                                        |                                                                                       |                  |
|----------------------------------------|---------------------------------------------------------------------------------------|------------------|
| Direct-zol™ RNA Purification kit       | Zymo Research                                                                         | Cat#R2062        |
| Luna Universal qPCR Master Mix         | New England Biolabs (NEB)                                                             | Cat#M3003X       |
| Deposited data                         |                                                                                       |                  |
| Human RNA-seq                          |                                                                                       |                  |
| Mouse RNA-seq                          |                                                                                       |                  |
| Pig RNA-seq                            |                                                                                       |                  |
| Experimental models: Organisms/strains |                                                                                       |                  |
| Mouse: Crl:CD1(ICR)                    | Charles River Laboratories                                                            | Strain: 022      |
| Yucatan pig                            | Sinclair BioResources                                                                 | N/A              |
| Oligonucleotides                       |                                                                                       |                  |
| qPCR primers, see Table S1             | This paper                                                                            | N/A              |
| Software and algorithms                |                                                                                       |                  |
| GraphPad Prism 10.0                    | <a href="https://www.graphpad.com/">https://www.graphpad.com/</a>                     | N/A              |
| Cellpose                               | <a href="https://www.cellpose.org/">https://www.cellpose.org/</a>                     | N/A              |
| ImageJ                                 | <a href="https://imagej.net/ij/">https://imagej.net/ij/</a>                           | N/A              |
| Leica Application Suite X (LAS X)      | <a href="https://www.leica-microsystems.com/">https://www.leica-microsystems.com/</a> | N/A              |
| Other                                  |                                                                                       |                  |
| Fetal Bovine Serum                     | Cytiva                                                                                | Cat#SH30088.03HI |
| Trypsin-EDTA (0.05%)                   | Gibco                                                                                 | Cat#25300054     |
| Trypsin-EDTA (0.25%)                   | Gibco                                                                                 | Cat#15050065     |
| DMEM medium, high glucose              | Cytiva                                                                                | Cat#SH30243.02   |

639

## 640 [Resource availability](#)

### 641 [Lead contact](#)

642 *Further information and requests for resources and reagents should be directed to and will*  
643 *be fulfilled by the lead contact, Munemasa Mori ([mm4452@cumc.columbia.edu](mailto:mm4452@cumc.columbia.edu)).*

### 644 [Materials availability](#)

645 *All biological materials used in this study are available from the [lead contact](#) upon request.*

### 646 [Data and code availability](#)

- 647
- 648 • This paper does not report original code.
  - 649 • Any additional information required to reanalyze the data reported in this paper is  
650 available from the [lead contact](#) upon request.

650

## 651 [Experimental model and study participant details](#)

### 652 *Animals*

653 *All surgical procedures were conducted under the approval of the Columbia University*  
654 *Institutional Animal Care and Use Committee and USAMRMC Animal Care and Use Review*  
655 *Office (ACURO). For pig experiment, Timed-pregnant Yucatan miniature sows were*

656 *obtained from Sinclair BioResources. For mouse experiment, CD-1 mice (male (8 weeks),*  
657 *female (8 weeks)) were purchased from Charles River Laboratories.*

658

### 659 ***Parietal pig mesothelial progenitor cell (MPC) isolation***

660 *E80 Yucatan pig embryo was surgically collected from the Yucatan pig mother. After*  
661 *euthanization, the thorax was collected. For MPC isolation, we performed 2 methods; 1) the*  
662 *mesothelial tissue was isolated from the E80 pig thoracic wall with a cell scraper (Fisher*  
663 *Scientific), by following incubation in 0.25% trypsin-EDTA solution for 20 min at 37 °C and*  
664 *2) 0.25% trypsin treatment on the thoracic wall, by following 20 min incubation at 37 °C.*  
665 *After trypsin-EDTA treatment, the dissociated cell was washed with PBS by centrifuge and*  
666 *replacement of the PBS (350 x g, 5 min, 4 °C). The cell pellet was incubated in RBC lysis*  
667 *buffer solution for 10 min at 4°C for RBC lysis (Biolegend), following PBS wash by*  
668 *centrifuge (350 x g, 5 min, 4 °C). After washing with PBS, the cell pellet was filtered with a*  
669 *cell strainer (40um pore size, MTC Bio) and seeded on a type I collagen (from rat tail,*  
670 *Sigma-Aldrich)- coated 6-well tissue culture plate. The MPCs (P0) were cultured in MPC*  
671 *culture medium (DMEM (high glucose, Gibco) + 10% FBS (Cytiva) + 1% pen/strep (Gibco))*  
672 *for 7 days. For passage, MPCs were washed with PBS and dissociated with 0.05% trypsin-*  
673 *EDTA (Gibco) for 5min at 37°C). For MPC culture and its analysis for the experiments,*  
674 *passages 6-8 MPC were cultured on gelatin-coated tissue culture plates.*

675

### 676 ***Parietal mouse mesothelial progenitor cell (MPC) isolation***

677 *Mouse MPC was isolated from E17.5 embryonic thorax by treatment of 0.05 % or 0.25 %*  
678 *trypsin-EDTA (Gibco) solution for 20 min at 37 °C. The isolation procedure was the same as*  
679 *pig MPC isolation. The mouse MPC was cultured in an MPC culture medium with the*  
680 *replacement of the cell culture media every other day.*

681

### 682 ***Parietal pig mesothelial progenitor cell (MPC) culture***

683 *To investigate the MPC cell fate by signaling molecules, MPCs were cultured in the MPC*  
684 *culture medium with various signaling molecules (FGF2 (Peprotech), PDGF-BB, BMP4*  
685 *(R&D systems), retinoic acid (RA, Sigma-Aldrich), CHIR99021 (MedChem Express),*  
686 *ascorbic acid (AA, Fisher Chemical), purmorphamine (Shh, Tocris)) and the inhibitors*  
687 *(SU5402 as FGFR inhibitor (MedChem Express), CP673451 as PDGFR inhibitor (MedChem*  
688 *Express), and dorsomorphin (Tocris) for 3, 10, or 14 days. During MPC culture, the MPC*  
689 *culture medium, including signaling molecules, was replaced every other day and passaged*  
690 *at day 3, 6, and 10 to avoid full confluency.*

691

### 692 ***RT-qPCR***

693 mRNA was isolated from MPCs with Direct-zol RNA Microprep isolation kit (Zymo  
694 Research) after lysis of MPCs with IBI isolate total reagent (IBI Scientific). For cDNA  
695 synthesis, the isolated mRNA was mixed with PrimeScript RT Master Mix (Takara bio),  
696 followed by cDNA synthesis protocol. For RT-qPCR analysis, the synthesized cDNA was  
697 mixed with qPCR primers and Luna Universal qPCR Master Mix (New England Biolabs  
698 (NEB). RT-qPCR was conducted with Quantstudio (Applied Biosystems). mRNA expression  
699 of each gene was normalized with the housekeeping gene (GAPDH). The relative mRNA  
700 expression of the genes was normalized with the control group (MPC culture in DMEM +  
701 10% FBS + 1% pen/strep).

702

### 703 **Immunofluorescence (IF)**

704 For cell sample preparation, MPCs were fixed with 3.7% paraformaldehyde (PFA) for 10  
705 min at room temperature. For tissue sample preparation, 10 $\mu$ m-frozen sectioned tissue  
706 samples were washed with PBS 3 times, followed by antigen retrieval with citrate-based  
707 buffer (Vector Laboratories) in the microwave for 8 min. After washing the cells and the  
708 tissue samples with PBS 3 times, the primary antibodies in dilution solution (0.25% triton X-  
709 100 + 0.75% BSA in PBS) were treated to the samples and incubated at 4°C for overnight.  
710 After 3 times PBS wash on the following day, the secondary antibodies and DAPI were  
711 treated (0.75% BSA in PBS) for 1 hour at room temperature. Then, the sample was mounted  
712 with a coverglass, anti-fade reagent (Invitrogen). For pig cell/tissue CALB2 staining,  
713 primary antibody-treated samples were treated with HRP conjugated anti-chicken antibody  
714 (in PBS) and incubated for 30 min at room temperature. After PBS wash, Cy3 tyramide  
715 (1:1000 diluted in 100 mM borate + 0.1% Tween-20 + 0.003 % H<sub>2</sub>O<sub>2</sub> solution (pH 8.5)) was  
716 treated in the samples and incubated for 15 min at room temperature in the dark. After PBS  
717 wash, the samples were mounted with a coverglass and an anti-fade reagent (Invitrogen).  
718 The cell samples were visualized with a Leica DMI microscope (Leica). The tissue samples  
719 were visualized with a Zeiss confocal microscope (Zeiss).

720

### 721 **RNA-seq data analysis**

722 For human and mouse RNA-seq data analysis, we utilized the database from the previous  
723 studies.<sup>30,31</sup>

724

## 725 **Quantification and statistical analysis**

726 Quantification of cell number in the phase contrast images was conducted by ImageJ. For  
727 immunostained cell (single-immunostained and co-immunostained cell population) and  
728 DAPI-stained cell counting from IF images, Cellpose software was used. The mean

729 *fluorescence intensity (MFI) of each IF sample was measured in the non-overlapping random*  
730 *fields using ImageJ software. Data analysis was performed using Prism 10. Data acquired by*  
731 *performing biological replicas ((n = 3) for RT-qPCR and phase contrast images, (n = 4) for*  
732 *IF images) of three or four independent experiments are presented as the mean ± standard*  
733 *derivation (SD). Statistical significance was determined using a one-way ANOVA or a two-*  
734 *tailed t-test. \*p < 0.05, \*\*p < 0.01, \*\*\*p < 0.001, \*\*\*\*p < 0.0001, ns: non-significant.*

735

736

## 737 **Additional resources**

738 *Human scRNA-seq: [https://cellxgene.cziscience.com/e/f9846bb4-784d-4582-92c1-](https://cellxgene.cziscience.com/e/f9846bb4-784d-4582-92c1-3f279e4c6f0c.cxg/)*  
739 *[3f279e4c6f0c.cxg/](https://cellxgene.cziscience.com/e/f9846bb4-784d-4582-92c1-3f279e4c6f0c.cxg/)*

740 *Mouse sdRNA-seq: <https://lungcells.app.vumc.org/>*

741
